# Supplementary material for: Maximum aerodynamic force production by the wandering glider dragonfly (Pantala flavescens, Libellulidae)
Source: Oxford University Press journal article supplement (doi:10.1242/jeb.218552), 2020-01-01
Supplement: jeb218552supp.pdf [file jeb218552supp.pdf]

## 1. Figures

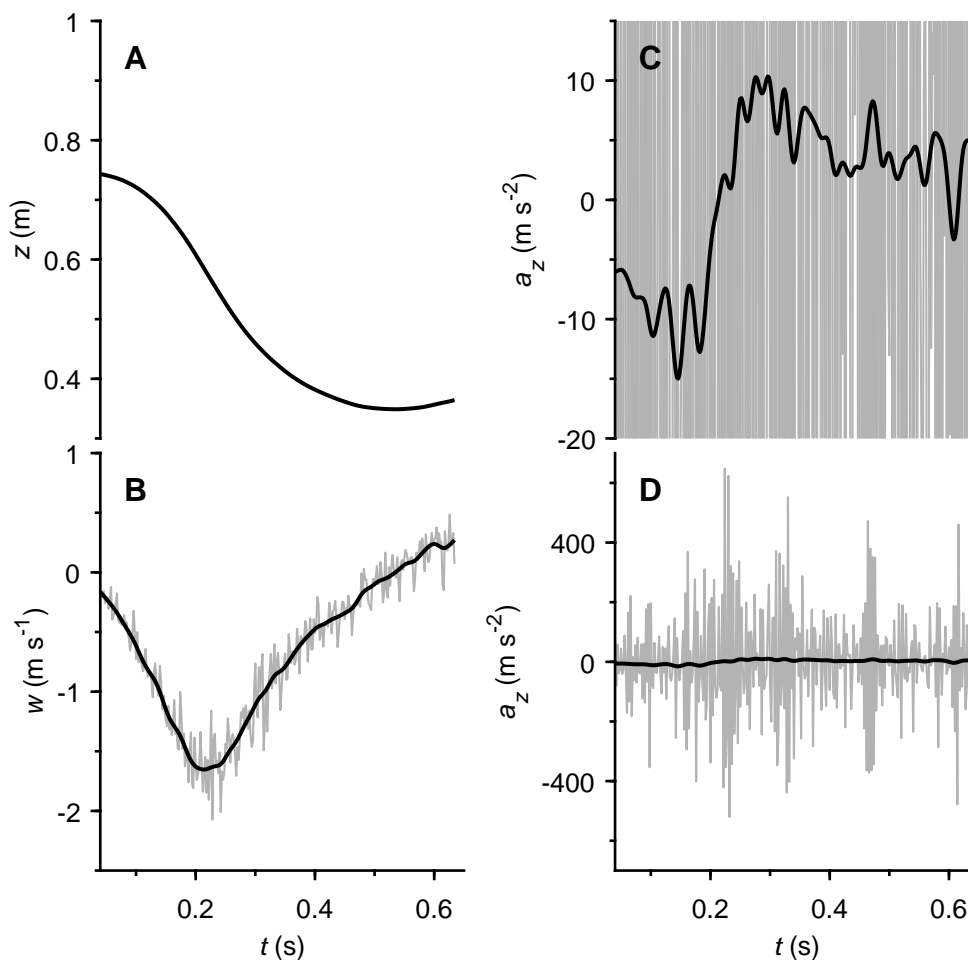

**Fig. S1**

**Fig. S1. Kinematic parameters derived from raw and smoothed vertical position data for one loaded fall trial** (trial index: 1808091348; performing individual index: 180809-4). (A) raw and smoothed vertical position data ( $z$ , Z-position after release;  $t=0$ , time of release); (B) vertical velocity data derived from raw and smoothed vertical position data, respectively ( $w$ , Z-velocity after release); (C) vertical acceleration data derived from raw and smoothed vertical position data, respectively, with a smaller scale of  $a_z$  ( $a_z$ , Z-acceleration after release); (D) vertical acceleration data derived from raw and smoothed vertical position data, respectively, with a larger scale of  $a_z$ . In (A) to (D), thin gray line indicates raw positional data or kinematic data obtained by differentiating the raw positional data, thick black line indicates smoothed positional data or kinematic data obtained by differentiating the smoothed positional data. In (A), two lines almost overlap completely as the two set of positional data are close to each other. In (C), a smaller scale of  $a_z$  is used to clearly illustrate the thick black line. In (D), a larger scale of  $a_z$  is used to clearly illustrate the thin gray line.

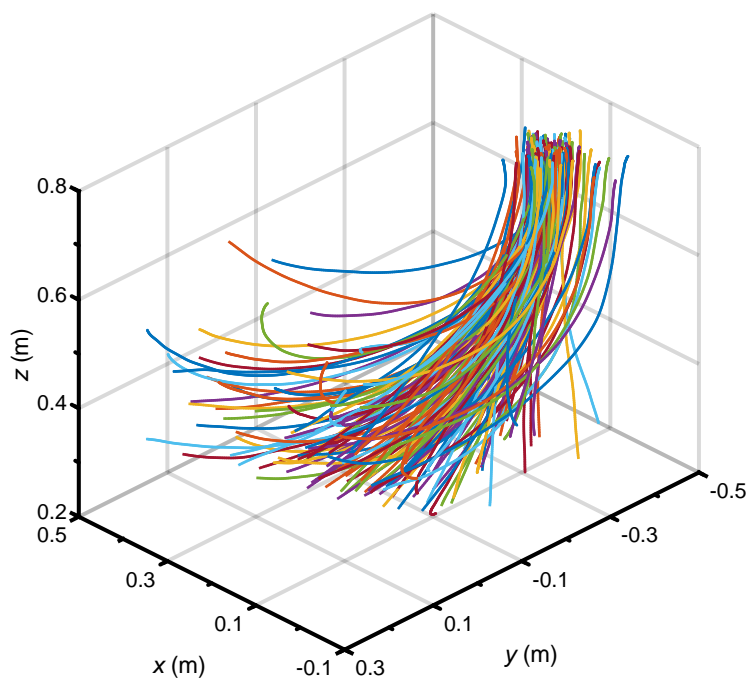

**Fig. S2**

**Fig. S2. Three-dimensional flight trajectories tracked from 143 full-trajectory trials.**

## 2. Tables

**Table S1.** Information for individual dragonflies: loading ratio ( $R$ ), body mass ( $m_b$ ), morphological data ( $l_b$ : body length;  $l_{fws}$ : forewing span length;  $l_{hws}$ : hindwing span length), force estimates ( $F_{max}$  and  $F_{max}^*$ ), and number of QCA trials ( $N_{QCA}$ ).

| Individual index | $R$ | $m_b$ | $l_b$ | $l_{fws}$ | $l_{hws}$ | $F_{max}$ (s. e. m.) | $F_{max}^*$ (s. e. m.) | $N_{QCA}$ |
|------------------|-----|-------|-------|-----------|-----------|----------------------|------------------------|-----------|
| 180803-4         | 1.5 | 392   | 52    | 47        | 44        | 1.63                 | 4.24                   | 1         |
| 180803-5         | 1.5 | 253   | 53    | 47        | 44        | 1.19 (0.020)         | 4.80 (0.080)           | 11        |
| 180803-7         | 1.5 | 276   | 52    | 45        | 42        | 1.14 (0.020)         | 4.23 (0.072)           | 3         |
| 180804-4         | 1.5 | 352   | n/a   | n/a       | n/a       | 1.40 (0.073)         | 4.05 (0.212)           | 5         |
| 180804-6         | 1.5 | 337   | n/a   | n/a       | n/a       | 1.57 (0.070)         | 4.74 (0.213)           | 7         |
| 180804-7         | 1.5 | 342   | n/a   | n/a       | n/a       | 1.78 (0.055)         | 5.31 (0.165)           | 5         |
| 180804-9         | 1.5 | 364   | n/a   | n/a       | n/a       | 1.58 (0.025)         | 4.43 (0.070)           | 3         |
| 180804-10        | 1.5 | 386   | n/a   | n/a       | n/a       | 1.53 (0.053)         | 4.03 (0.140)           | 8         |
| 180805-1         | 1.5 | 399   | 50    | 44        | 42        | 1.55 (0.037)         | 3.96 (0.096)           | 3         |
| 180805-2         | 1.5 | 390   | n/a   | n/a       | n/a       | 1.81 (0.041)         | 4.74 (0.106)           | 2         |
| 180805-3         | 1.5 | 358   | 49    | 44        | 42.5      | 1.31 (0.074)         | 3.74 (0.211)           | 2         |
| 180805-4         | 1.5 | 344   | 50    | 46        | 44        | 1.47 (0.016)         | 4.36 (0.047)           | 12        |
| 180805-5         | 1.5 | 415   | 52    | 44        | 43        | 1.74 (0.043)         | 4.28 (0.107)           | 3         |
| 180805-6         | 1.5 | 364   | 51    | 42        | 40        | 1.47 (0.020)         | 4.12 (0.056)           | 10        |
| 180805-7         | 1.5 | 328   | 51    | 43        | 40.5      | 1.55 (0.077)         | 4.81 (0.240)           | 5         |
| 180805-10        | 1.5 | 224   | 49    | 43        | 40        | 0.86 (0.005)         | 3.93 (0.025)           | 4         |
| 180809-2         | 1.2 | 374   | 50    | 44        | 42.5      | 1.38(0.000)          | 3.77(0.127)            | 8         |
| 180809-4         | 1.8 | 328   | 48    | 43        | 40        | 1.50 (0.022)         | 4.68 (0.069)           | 8         |
| 180809-5         | 1.2 | 212   | 48    | 42        | 41        | 0.65(0.000)          | 3.12(0.020)            | 8         |
| 180809-7         | 1.5 | 450   | 50    | 43        | 41        | 1.89 (0.035)         | 4.29 (0.078)           | 6         |
| 180809-9         | 1.0 | 446   | 50    | 42        | 40.5      | 1.69(0.000)          | 3.87(0.048)            | 8         |
| 180809-10        | 1.5 | 423   | 50    | 42        | 40        | 1.76 (0.017)         | 4.25 (0.040)           | 2         |
| 180809-12        | 1.8 | 390   | 50    | 43        | 41        | 1.81 (0.027)         | 4.75 (0.071)           | 3         |
| 180810-1         | 1.8 | 232   | 49    | 40        | 38.5      | 1.00 (0.043)         | 4.40 (0.190)           | 3         |
| 180810-3         | 1.8 | 340   | 50    | 41        | 39.5      | 1.82 (0.052)         | 5.47 (0.157)           | 5         |
| 180810-4         | 1.8 | 264   | 50    | 42        | 40.5      | 1.21                 | 4.66                   | 1         |
| 180810-5         | 1.8 | 306   | 51    | 41        | 39.5      | 1.40 (0.011)         | 4.65 (0.037)           | 4         |
| 180810-7         | 1.8 | 414   | 51    | 43        | 40        | 1.53 (0.028)         | 3.76 (0.070)           | 6         |
| 180810-8         | 1.5 | 441   | 51    | 43        | 40        | 1.52                 | 3.51                   | 1         |
| 180810-9         | 1.2 | 443   | 50    | 42        | 40        | 1.54                 | 3.56                   | 1         |

Units:  $m_b$ , mg;  $l_b$ ,  $l_{fws}$ , and  $l_{hws}$ , mm;  $F_{max}$  (s. e. m.),  $10^{-2}$  N.

**Table S2.** Information for each recorded trial: categorical data, temporal data on the QCA period corresponding to the maximum force production ( $t_{QCA_s}$ : starting time;  $t_{QCA_e}$ : ending time), force estimates ( $F_V^*$ ,  $F_H^*$ ,  $F_V$ ,  $F_H$ ), time length of acceleration ( $T$ ), and recovery coefficient ( $C_r$ ).

| Individual index | Trial index | Full-trajectory trial? | QCA trial? | $t_{QCA_s}$ | $t_{QCA_e}$ | $F_V^*$ | $F_H^*$ | $F_V$ | $F_H$ | $T$   | $C_r$ |
|------------------|-------------|------------------------|------------|-------------|-------------|---------|---------|-------|-------|-------|-------|
| 180803-4         | 1808031719  | no                     | no         | n/a         | n/a         | n/a     | n/a     | n/a   | n/a   | n/a   | 0.322 |
| 180803-4         | 1808031722  | no                     | yes        | 0.082       | 0.232       | 4.239   | 0.999   | 1.629 | 0.384 | 0.228 | 0.728 |
| 180803-5         | 1808031757  | yes                    | yes        | 0.422       | 0.572       | 3.691   | 0.431   | 0.915 | 0.107 | 0.338 | 1.156 |
| 180803-5         | 1808031801  | yes                    | yes        | 0.262       | 0.412       | 4.507   | 1.144   | 1.118 | 0.284 | 0.362 | 1.320 |
| 180803-5         | 1808031804  | yes                    | yes        | 0.214       | 0.364       | 4.511   | 1.724   | 1.119 | 0.428 | 0.374 | 1.391 |
| 180803-5         | 1808031812  | yes                    | yes        | 0.240       | 0.390       | 4.398   | 1.107   | 1.091 | 0.275 | 0.308 | 1.130 |
| 180803-5         | 1808031815  | yes                    | yes        | 0.246       | 0.396       | 4.463   | 1.268   | 1.107 | 0.314 | 0.354 | 1.353 |
| 180803-5         | 1808031817  | yes                    | yes        | 0.232       | 0.382       | 4.921   | 0.901   | 1.220 | 0.223 | 0.310 | 1.361 |
| 180803-5         | 1808031820  | yes                    | yes        | 0.248       | 0.398       | 4.929   | 1.053   | 1.222 | 0.261 | 0.300 | 1.199 |
| 180803-5         | 1808031822  | yes                    | yes        | 0.306       | 0.456       | 4.947   | 0.811   | 1.227 | 0.201 | 0.280 | 1.257 |
| 180803-5         | 1808031825  | yes                    | yes        | 0.206       | 0.356       | 4.976   | 1.318   | 1.234 | 0.327 | 0.362 | 1.335 |
| 180803-5         | 1808031827  | yes                    | yes        | 0.330       | 0.480       | 4.945   | 0.828   | 1.226 | 0.205 | 0.324 | 1.410 |
| 180803-5         | 1808031830  | yes                    | yes        | 0.242       | 0.422       | 4.812   | 0.919   | 1.193 | 0.228 | 0.292 | 1.187 |
| 180803-7         | 1808031845  | yes                    | no         | n/a         | n/a         | n/a     | n/a     | n/a   | n/a   | n/a   | 0.386 |
| 180803-7         | 1808031848  | no                     | no         | n/a         | n/a         | n/a     | n/a     | n/a   | n/a   | n/a   | 0.376 |
| 180803-7         | 1808031850  | no                     | yes        | 0.002       | 0.152       | 4.325   | 2.334   | 1.170 | 0.631 | 0.152 | 0.640 |
| 180803-7         | 1808031852  | yes                    | no         | n/a         | n/a         | n/a     | n/a     | n/a   | n/a   | n/a   | 0.319 |
| 180803-7         | 1808031855  | yes                    | yes        | 0.220       | 0.370       | 4.002   | 2.460   | 1.083 | 0.666 | 0.166 | 0.472 |
| 180803-7         | 1808031857  | no                     | yes        | 0.040       | 0.190       | 4.156   | 1.836   | 1.124 | 0.497 | 0.228 | 0.828 |
| 180803-7         | 1808031859  | yes                    | no         | n/a         | n/a         | n/a     | n/a     | n/a   | n/a   | n/a   | 0.266 |
| 180803-7         | 1808031902  | no                     | no         | n/a         | n/a         | n/a     | n/a     | n/a   | n/a   | n/a   | 0.525 |
| 180803-7         | 1808031904  | no                     | no         | n/a         | n/a         | n/a     | n/a     | n/a   | n/a   | n/a   | 0.668 |

|           |            |     |     |       |       |       |       |       |       |       |       |       |
|-----------|------------|-----|-----|-------|-------|-------|-------|-------|-------|-------|-------|-------|
| 180803-7  | 1808031906 | no  | no  | n/a   | 0.120 |
| 180804-4  | 1808041504 | yes | yes | 0.294 | 0.444 | 3.838 | 0.601 | 1.324 | 0.207 | 0.410 | 1.335 |       |
| 180804-4  | 1808041522 | no  | yes | 0.062 | 0.220 | 3.735 | 1.512 | 1.289 | 0.521 | 0.268 | 0.578 |       |
| 180804-4  | 1808041525 | no  | yes | 0.080 | 0.230 | 4.598 | 1.063 | 1.586 | 0.367 | 0.230 | 1.565 |       |
| 180804-4  | 1808041527 | yes | no  | n/a   | 0.257 |       |
| 180804-4  | 1808041530 | no  | yes | 0.044 | 0.308 | 3.257 | 1.246 | 1.124 | 0.430 | 0.272 | 0.516 |       |
| 180804-4  | 1808041533 | no  | yes | 0.142 | 0.292 | 3.833 | 1.240 | 1.322 | 0.428 | 0.264 | 0.635 |       |
| 180804-6  | 1808041538 | yes | yes | 0.368 | 0.518 | 3.469 | 0.401 | 1.146 | 0.132 | 0.546 | 1.488 |       |
| 180804-6  | 1808041540 | yes | yes | 0.180 | 0.330 | 4.902 | 1.301 | 1.619 | 0.430 | 0.358 | 1.474 |       |
| 180804-6  | 1808041551 | yes | no  | n/a   | 0.398 |       |
| 180804-6  | 1808041554 | yes | yes | 0.232 | 0.390 | 5.282 | 1.023 | 1.745 | 0.338 | 0.396 | 1.411 |       |
| 180804-6  | 1808041557 | yes | yes | 0.218 | 0.394 | 3.399 | 0.669 | 1.123 | 0.221 | 0.620 | 1.440 |       |
| 180804-6  | 1808041600 | yes | no  | n/a   | 0.091 |       |
| 180804-6  | 1808041602 | yes | yes | 0.254 | 0.404 | 4.787 | 1.049 | 1.581 | 0.347 | 0.318 | 1.257 |       |
| 180804-6  | 1808041606 | yes | yes | 0.238 | 0.388 | 4.730 | 1.432 | 1.563 | 0.473 | 0.140 | 0.613 |       |
| 180804-6  | 1808041608 | yes | yes | 0.280 | 0.430 | 4.674 | 0.362 | 1.544 | 0.120 | 0.482 | 1.777 |       |
| 180804-6  | 1808041610 | yes | no  | n/a   | 0.486 |       |
| 180804-7  | 1808041616 | no  | yes | 0.062 | 0.212 | 4.824 | 2.396 | 1.617 | 0.803 | 0.210 | 0.766 |       |
| 180804-7  | 1808041619 | no  | yes | 0.062 | 0.212 | 4.975 | 1.437 | 1.668 | 0.482 | 0.252 | 0.867 |       |
| 180804-7  | 1808041636 | no  | yes | 0.088 | 0.238 | 4.855 | 2.044 | 1.627 | 0.685 | 0.180 | 0.617 |       |
| 180804-7  | 1808041638 | no  | yes | 0.110 | 0.260 | 5.703 | 1.100 | 1.912 | 0.369 | 0.262 | 1.053 |       |
| 180804-7  | 1808041639 | no  | yes | 0.098 | 0.248 | 5.349 | 0.488 | 1.793 | 0.164 | 0.278 | 1.261 |       |
| 180804-9  | 1808041708 | no  | yes | 0.080 | 0.230 | 4.484 | 1.522 | 1.600 | 0.543 | 0.192 | 0.614 |       |
| 180804-9  | 1808041710 | no  | yes | 0.120 | 0.270 | 4.456 | 0.448 | 1.590 | 0.160 | 0.270 | 1.277 |       |
| 180804-9  | 1808041713 | yes | yes | 0.352 | 0.502 | 4.116 | 0.561 | 1.469 | 0.200 | 0.284 | 0.873 |       |
| 180804-10 | 1808041729 | yes | yes | 0.326 | 0.476 | 3.761 | 0.640 | 1.423 | 0.242 | 0.400 | 1.058 |       |

|           |            |     |     |       |       |       |       |       |       |       |       |
|-----------|------------|-----|-----|-------|-------|-------|-------|-------|-------|-------|-------|
| 180804-10 | 1808041731 | yes | yes | 0.218 | 0.388 | 4.013 | 1.007 | 1.518 | 0.381 | 0.424 | 1.156 |
| 180804-10 | 1808041734 | yes | no  | n/a   | 0.543 |
| 180804-10 | 1808041737 | yes | yes | 0.276 | 0.426 | 4.622 | 0.548 | 1.749 | 0.207 | 0.268 | 1.160 |
| 180804-10 | 1808041739 | yes | yes | 0.310 | 0.460 | 3.594 | 0.833 | 1.360 | 0.315 | 0.292 | 0.687 |
| 180804-10 | 1808041741 | yes | yes | 0.338 | 0.488 | 3.728 | 0.735 | 1.410 | 0.278 | 0.366 | 0.898 |
| 180804-10 | 1808041743 | yes | yes | 0.234 | 0.384 | 3.774 | 1.349 | 1.428 | 0.510 | 0.132 | 0.412 |
| 180804-10 | 1808041745 | yes | yes | 0.312 | 0.462 | 3.774 | 0.927 | 1.428 | 0.351 | 0.246 | 0.737 |
| 180804-10 | 1808041747 | yes | yes | 0.264 | 0.466 | 3.782 | 1.437 | 1.431 | 0.544 | 0.234 | 0.654 |
| 180804-10 | 1808041749 | yes | no  | n/a   | 0.517 |
| 180805-2  | 1808051455 | no  | yes | 0.088 | 0.238 | 4.823 | 1.466 | 1.844 | 0.560 | 0.166 | 0.712 |
| 180805-2  | 1808051457 | no  | yes | 0.132 | 0.286 | 4.488 | 0.465 | 1.716 | 0.178 | 0.246 | 0.957 |
| 180805-2  | 1808051500 | yes | no  | n/a   | 0.554 |
| 180805-4  | 1808051509 | yes | yes | 0.210 | 0.376 | 4.198 | 0.840 | 1.415 | 0.283 | 0.314 | 0.915 |
| 180805-4  | 1808051512 | yes | yes | 0.184 | 0.334 | 4.166 | 0.876 | 1.405 | 0.295 | 0.508 | 1.367 |
| 180805-4  | 1808051515 | yes | yes | 0.192 | 0.342 | 4.169 | 1.415 | 1.406 | 0.477 | 0.446 | 1.286 |
| 180805-4  | 1808051518 | yes | yes | 0.216 | 0.394 | 4.363 | 1.110 | 1.471 | 0.374 | 0.418 | 1.261 |
| 180805-4  | 1808051522 | yes | yes | 0.214 | 0.430 | 4.387 | 0.546 | 1.479 | 0.184 | 0.412 | 1.397 |
| 180805-4  | 1808051524 | yes | yes | 0.228 | 0.378 | 4.453 | 1.209 | 1.501 | 0.408 | 0.144 | 0.577 |
| 180805-4  | 1808051527 | yes | yes | 0.270 | 0.420 | 4.591 | 0.615 | 1.548 | 0.207 | 0.288 | 1.008 |
| 180805-4  | 1808051529 | yes | yes | 0.330 | 0.480 | 4.349 | 0.775 | 1.466 | 0.261 | 0.362 | 1.168 |
| 180805-4  | 1808051531 | yes | yes | 0.268 | 0.432 | 3.957 | 1.005 | 1.334 | 0.339 | 0.444 | 1.351 |
| 180805-4  | 1808051533 | yes | yes | 0.302 | 0.452 | 4.345 | 0.545 | 1.465 | 0.184 | 0.386 | 1.283 |
| 180805-4  | 1808051535 | yes | yes | 0.300 | 0.450 | 4.208 | 0.423 | 1.419 | 0.142 | 0.360 | 1.212 |
| 180805-4  | 1808051536 | yes | yes | 0.302 | 0.452 | 4.213 | 0.794 | 1.421 | 0.268 | 0.428 | 1.288 |
| 180805-1  | 1808051546 | yes | yes | 0.240 | 0.390 | 4.027 | 1.352 | 1.575 | 0.529 | 0.262 | 0.869 |
| 180805-1  | 1808051548 | yes | yes | 0.342 | 0.494 | 4.026 | 1.065 | 1.574 | 0.416 | 0.272 | 0.918 |

|           |            |     |     |       |       |       |       |       |       |       |       |
|-----------|------------|-----|-----|-------|-------|-------|-------|-------|-------|-------|-------|
| 180805-1  | 1808051553 | yes | yes | 0.214 | 0.364 | 3.542 | 1.476 | 1.385 | 0.577 | 0.140 | 0.316 |
| 180805-3  | 1808051559 | yes | yes | 0.272 | 0.430 | 3.268 | 1.466 | 1.147 | 0.514 | 0.538 | 0.874 |
| 180805-3  | 1808051604 | yes | yes | 0.262 | 0.412 | 3.916 | 1.351 | 1.374 | 0.474 | 0.244 | 0.646 |
| 180805-5  | 1808051614 | yes | yes | 0.240 | 0.390 | 3.979 | 2.338 | 1.619 | 0.951 | 0.138 | 0.406 |
| 180805-5  | 1808051616 | yes | yes | 0.222 | 0.372 | 4.428 | 1.959 | 1.801 | 0.797 | 0.208 | 0.761 |
| 180805-5  | 1808051618 | yes | yes | 0.232 | 0.382 | 4.152 | 2.230 | 1.689 | 0.907 | 0.152 | 0.478 |
| 180805-5  | 1808051621 | yes | no  | n/a   | 0.361 |
| 180805-6  | 1808051642 | yes | yes | 0.282 | 0.432 | 3.641 | 0.756 | 1.299 | 0.270 | 0.258 | 0.684 |
| 180805-6  | 1808051646 | yes | yes | 0.308 | 0.458 | 3.955 | 0.428 | 1.411 | 0.153 | 0.358 | 1.046 |
| 180805-6  | 1808051648 | yes | yes | 0.306 | 0.456 | 4.031 | 0.302 | 1.438 | 0.108 | 0.324 | 0.999 |
| 180805-6  | 1808051650 | yes | yes | 0.308 | 0.458 | 3.910 | 0.294 | 1.395 | 0.105 | 0.334 | 1.162 |
| 180805-6  | 1808051652 | yes | yes | 0.294 | 0.444 | 3.941 | 0.148 | 1.406 | 0.053 | 0.316 | 1.097 |
| 180805-6  | 1808051654 | yes | yes | 0.328 | 0.478 | 4.011 | 0.405 | 1.431 | 0.144 | 0.344 | 1.116 |
| 180805-6  | 1808051657 | yes | yes | 0.294 | 0.444 | 4.089 | 0.435 | 1.459 | 0.155 | 0.266 | 0.976 |
| 180805-6  | 1808051659 | yes | yes | 0.304 | 0.454 | 4.292 | 0.192 | 1.531 | 0.068 | 0.282 | 1.006 |
| 180805-6  | 1808051701 | yes | yes | 0.294 | 0.444 | 4.133 | 0.550 | 1.475 | 0.196 | 0.332 | 1.079 |
| 180805-6  | 1808051703 | yes | yes | 0.302 | 0.452 | 4.315 | 0.343 | 1.539 | 0.123 | 0.272 | 1.053 |
| 180805-7  | 1808051711 | yes | yes | 0.306 | 0.456 | 5.379 | 0.944 | 1.729 | 0.304 | 0.292 | 1.546 |
| 180805-7  | 1808051713 | yes | yes | 0.212 | 0.362 | 4.226 | 1.492 | 1.359 | 0.480 | 0.380 | 1.771 |
| 180805-7  | 1808051717 | yes | yes | 0.296 | 0.446 | 4.799 | 0.530 | 1.543 | 0.170 | 0.312 | 1.193 |
| 180805-7  | 1808051720 | yes | yes | 0.226 | 0.386 | 3.773 | 1.305 | 1.213 | 0.420 | 0.262 | 0.966 |
| 180805-7  | 1808051724 | yes | yes | 0.326 | 0.476 | 4.671 | 0.683 | 1.502 | 0.220 | 0.206 | 1.060 |
| 180805-10 | 1808051808 | yes | yes | 0.214 | 0.378 | 3.803 | 1.150 | 0.835 | 0.252 | 0.206 | 0.564 |
| 180805-10 | 1808051810 | yes | yes | 0.252 | 0.402 | 3.912 | 1.120 | 0.859 | 0.246 | 0.178 | 0.500 |
| 180805-10 | 1808051813 | yes | yes | 0.296 | 0.446 | 3.923 | 1.313 | 0.861 | 0.288 | 0.202 | 0.623 |
| 180805-10 | 1808051816 | yes | yes | 0.244 | 0.394 | 3.972 | 1.872 | 0.872 | 0.411 | 0.140 | 0.477 |

|          |            |     |     |       |       |       |       |       |       |       |       |
|----------|------------|-----|-----|-------|-------|-------|-------|-------|-------|-------|-------|
| 180809-4 | 1808091333 | yes | yes | 0.218 | 0.368 | 4.637 | 1.123 | 1.491 | 0.361 | 0.384 | 1.151 |
| 180809-4 | 1808091336 | yes | yes | 0.216 | 0.426 | 4.425 | 0.533 | 1.422 | 0.171 | 0.388 | 1.201 |
| 180809-4 | 1808091339 | yes | yes | 0.188 | 0.338 | 4.381 | 1.095 | 1.408 | 0.352 | 0.428 | 1.197 |
| 180809-4 | 1808091342 | yes | yes | 0.210 | 0.360 | 4.502 | 0.743 | 1.447 | 0.239 | 0.356 | 1.294 |
| 180809-4 | 1808091348 | yes | yes | 0.232 | 0.382 | 4.929 | 1.073 | 1.585 | 0.345 | 0.420 | 1.164 |
| 180809-4 | 1808091351 | yes | yes | 0.234 | 0.384 | 4.585 | 1.207 | 1.474 | 0.388 | 0.438 | 1.311 |
| 180809-4 | 1808091355 | yes | yes | 0.210 | 0.360 | 4.504 | 1.087 | 1.448 | 0.349 | 0.442 | 1.197 |
| 180809-4 | 1808091358 | yes | yes | 0.240 | 0.390 | 4.762 | 1.178 | 1.531 | 0.379 | 0.490 | 1.174 |
| 180809-2 | 1808091414 | yes | yes | 0.262 | 0.412 | 3.412 | 0.416 | 1.251 | 0.152 | 0.344 | 1.291 |
| 180809-2 | 1808091418 | yes | yes | 0.292 | 0.442 | 4.213 | 0.155 | 1.544 | 0.057 | 0.278 | 1.529 |
| 180809-2 | 1808091420 | yes | yes | 0.320 | 0.470 | 4.005 | 0.383 | 1.468 | 0.140 | 0.294 | 1.753 |
| 180809-2 | 1808091422 | yes | yes | 0.230 | 0.380 | 3.746 | 0.511 | 1.373 | 0.187 | 0.344 | 1.738 |
| 180809-2 | 1808091425 | yes | yes | 0.264 | 0.414 | 3.315 | 0.395 | 1.215 | 0.145 | 0.342 | 1.477 |
| 180809-2 | 1808091430 | yes | yes | 0.402 | 0.564 | 3.246 | 0.107 | 1.190 | 0.039 | 0.330 | 1.003 |
| 180809-2 | 1808091432 | yes | yes | 0.276 | 0.426 | 3.487 | 0.333 | 1.278 | 0.122 | 0.426 | 1.382 |
| 180809-2 | 1808091434 | yes | yes | 0.336 | 0.520 | 3.456 | 0.172 | 1.267 | 0.063 | 0.336 | 1.029 |
| 180809-5 | 1808091443 | yes | yes | 0.380 | 0.530 | 3.118 | 0.616 | 0.648 | 0.128 | 0.390 | 1.022 |
| 180809-5 | 1808091446 | yes | yes | 0.334 | 0.484 | 3.127 | 0.556 | 0.650 | 0.116 | 0.348 | 0.862 |
| 180809-5 | 1808091449 | yes | yes | 0.210 | 0.360 | 3.035 | 0.997 | 0.631 | 0.207 | 0.378 | 0.883 |
| 180809-5 | 1808091451 | yes | yes | 0.318 | 0.468 | 3.185 | 0.587 | 0.662 | 0.122 | 0.322 | 1.004 |
| 180809-5 | 1808091453 | yes | yes | 0.298 | 0.486 | 3.109 | 0.503 | 0.646 | 0.105 | 0.272 | 0.749 |
| 180809-5 | 1808091455 | yes | yes | 0.324 | 0.474 | 3.126 | 0.452 | 0.649 | 0.094 | 0.294 | 0.769 |
| 180809-5 | 1808091457 | yes | yes | 0.292 | 0.442 | 2.894 | 1.332 | 0.601 | 0.277 | 0.208 | 0.453 |
| 180809-5 | 1808091459 | yes | yes | 0.306 | 0.456 | 3.118 | 0.046 | 0.648 | 0.009 | 0.318 | 0.759 |
| 180809-7 | 1808091503 | yes | no  | n/a   | 0.175 |
| 180809-7 | 1808091505 | yes | yes | 0.276 | 0.426 | 4.497 | 0.637 | 1.983 | 0.281 | 0.270 | 1.064 |



|           |            |     |     |       |       |       |       |       |       |       |       |
|-----------|------------|-----|-----|-------|-------|-------|-------|-------|-------|-------|-------|
| 180809-7  | 1808091508 | yes | yes | 0.292 | 0.442 | 4.117 | 1.340 | 1.816 | 0.591 | 0.226 | 0.797 |
| 180809-7  | 1808091510 | yes | yes | 0.302 | 0.452 | 4.373 | 0.644 | 1.929 | 0.284 | 0.222 | 0.871 |
| 180809-7  | 1808091517 | yes | yes | 0.266 | 0.416 | 3.991 | 2.536 | 1.761 | 1.118 | 0.148 | 0.465 |
| 180809-7  | 1808091519 | yes | yes | 0.290 | 0.440 | 4.079 | 1.673 | 1.799 | 0.738 | 0.190 | 0.573 |
| 180809-7  | 1808091521 | yes | yes | 0.264 | 0.414 | 4.130 | 1.281 | 1.822 | 0.565 | 0.250 | 0.838 |
| 180809-12 | 1808091600 | yes | no  | n/a   | 0.176 |
| 180809-12 | 1808091602 | yes | no  | n/a   | 0.206 |
| 180809-12 | 1808091604 | no  | yes | 0.104 | 0.254 | 4.553 | 0.895 | 1.740 | 0.342 | 0.242 | 0.609 |
| 180809-12 | 1808091606 | no  | yes | 0.110 | 0.260 | 4.660 | 0.549 | 1.781 | 0.210 | 0.296 | 0.785 |
| 180809-12 | 1808091608 | no  | yes | 0.104 | 0.254 | 4.848 | 1.143 | 1.853 | 0.437 | 0.238 | 0.673 |
| 180809-9  | 1808091613 | yes | yes | 0.278 | 0.428 | 3.637 | 0.893 | 1.590 | 0.390 | 0.330 | 1.420 |
| 180809-9  | 1808091617 | yes | yes | 0.278 | 0.428 | 3.770 | 0.670 | 1.648 | 0.293 | 0.330 | 1.522 |
| 180809-9  | 1808091620 | yes | yes | 0.318 | 0.468 | 3.765 | 0.843 | 1.646 | 0.368 | 0.236 | 1.002 |
| 180809-9  | 1808091623 | yes | yes | 0.272 | 0.450 | 3.693 | 0.625 | 1.614 | 0.273 | 0.302 | 1.550 |
| 180809-9  | 1808091625 | yes | yes | 0.292 | 0.442 | 3.894 | 0.875 | 1.702 | 0.383 | 0.214 | 1.033 |
| 180809-9  | 1808091627 | yes | yes | 0.304 | 0.454 | 4.045 | 0.607 | 1.768 | 0.265 | 0.316 | 1.555 |
| 180809-9  | 1808091630 | yes | yes | 0.302 | 0.452 | 3.886 | 0.638 | 1.699 | 0.279 | 0.218 | 1.080 |
| 180809-9  | 1808091634 | yes | yes | 0.296 | 0.446 | 3.769 | 0.743 | 1.647 | 0.325 | 0.242 | 1.150 |
| 180809-10 | 1808091636 | no  | yes | 0.100 | 0.274 | 4.156 | 1.384 | 1.723 | 0.574 | 0.240 | 0.665 |
| 180809-10 | 1808091639 | no  | yes | 0.110 | 0.260 | 4.285 | 1.208 | 1.777 | 0.501 | 0.214 | 0.695 |
| 180810-5  | 1808101503 | yes | no  | n/a   | 0.356 |
| 180810-5  | 1808101510 | no  | yes | 0.168 | 0.318 | 4.509 | 0.357 | 1.352 | 0.107 | 0.364 | 1.164 |
| 180810-5  | 1808101513 | yes | yes | 0.216 | 0.366 | 4.718 | 1.554 | 1.415 | 0.466 | 0.158 | 0.550 |
| 180810-5  | 1808101516 | yes | yes | 0.238 | 0.388 | 4.576 | 1.668 | 1.372 | 0.500 | 0.188 | 0.657 |
| 180810-5  | 1808101518 | yes | yes | 0.288 | 0.438 | 4.658 | 1.499 | 1.397 | 0.449 | 0.216 | 0.684 |
| 180810-1  | 1808101533 | yes | yes | 0.244 | 0.394 | 4.448 | 1.367 | 1.011 | 0.311 | 0.198 | 0.661 |

|          |            |     |     |       |       |       |       |       |       |       |       |
|----------|------------|-----|-----|-------|-------|-------|-------|-------|-------|-------|-------|
| 180810-1 | 1808101537 | yes | no  | n/a   | 0.446 |
| 180810-1 | 1808101541 | yes | no  | n/a   | 0.417 |
| 180810-1 | 1808101543 | yes | yes | 0.204 | 0.354 | 3.631 | 2.028 | 0.826 | 0.461 | 0.134 | 0.191 |
| 180810-1 | 1808101545 | yes | no  | n/a   | 0.253 |
| 180810-1 | 1808101547 | no  | yes | 0.128 | 0.278 | 4.590 | 0.987 | 1.044 | 0.224 | 0.306 | 0.714 |
| 180810-3 | 1808101604 | no  | yes | 0.148 | 0.298 | 5.811 | 1.173 | 1.936 | 0.391 | 0.264 | 0.962 |
| 180810-3 | 1808101607 | no  | yes | 0.160 | 0.310 | 5.480 | 1.108 | 1.826 | 0.369 | 0.334 | 0.942 |
| 180810-3 | 1808101610 | no  | yes | 0.056 | 0.206 | 5.277 | 0.601 | 1.759 | 0.200 | 0.276 | 1.290 |
| 180810-3 | 1808101612 | yes | yes | 0.310 | 0.460 | 4.506 | 0.840 | 1.502 | 0.280 | 0.306 | 0.917 |
| 180810-3 | 1808101616 | yes | no  | n/a   | 0.253 |
| 180810-3 | 1808101618 | no  | yes | 0.154 | 0.304 | 5.375 | 0.551 | 1.791 | 0.184 | 0.308 | 1.171 |
| 180810-3 | 1808101625 | yes | no  | n/a   | 0.203 |
| 180810-3 | 1808101627 | no  | no  | n/a   | 0.623 |
| 180810-3 | 1808101629 | no  | no  | n/a   | 0.476 |
| 180810-4 | 1808101632 | yes | yes | 0.296 | 0.446 | 4.659 | 0.920 | 1.206 | 0.238 | 0.350 | 1.202 |
| 180810-7 | 1808101650 | yes | no  | n/a   | 0.153 |
| 180810-7 | 1808101653 | yes | yes | 0.262 | 0.422 | 3.742 | 0.730 | 1.518 | 0.296 | 0.190 | 0.387 |
| 180810-7 | 1808101655 | yes | yes | 0.234 | 0.384 | 3.961 | 1.462 | 1.607 | 0.593 | 0.196 | 0.445 |
| 180810-7 | 1808101657 | yes | yes | 0.232 | 0.422 | 3.650 | 1.120 | 1.481 | 0.455 | 0.184 | 0.370 |
| 180810-7 | 1808101700 | yes | yes | 0.242 | 0.392 | 3.570 | 1.397 | 1.449 | 0.567 | 0.230 | 0.391 |
| 180810-7 | 1808101703 | yes | yes | 0.226 | 0.422 | 3.756 | 0.963 | 1.524 | 0.391 | 0.212 | 0.414 |
| 180810-7 | 1808101705 | yes | no  | n/a   | 0.340 |
| 180810-7 | 1808101708 | no  | no  | n/a   | 0.371 |
| 180810-7 | 1808101709 | yes | yes | 0.262 | 0.412 | 3.422 | 0.913 | 1.389 | 0.370 | 0.192 | 0.225 |
| 180810-9 | 1808101721 | yes | yes | 0.320 | 0.470 | 3.558 | 0.323 | 1.545 | 0.140 | 0.306 | 1.089 |
| 180810-8 | 1808101730 | yes | yes | 0.304 | 0.454 | 3.509 | 1.653 | 1.517 | 0.715 | 0.138 | 0.345 |

Units:  $t_{QCA_s}$ ,  $t_{QCA_e}$ , and  $T$ , s;  $F_V$  and  $F_H$ ,  $10^{-2}$  N.

### 3. Movies

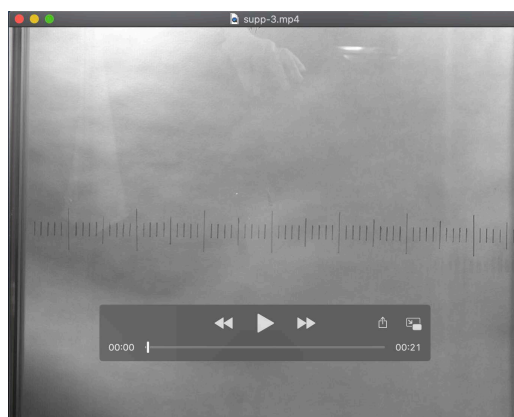

**Movie 1.** Raw video from one camera view for one loaded fall trial (trial index: 1808091348; performing individual index: 180809-4).

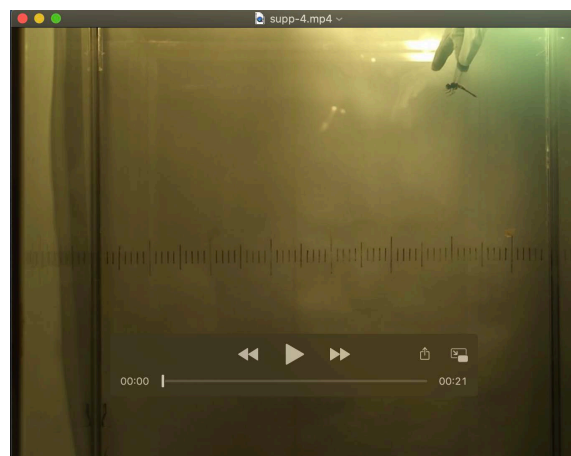

**Movie 2.** Raw video from the other camera view for one loaded fall trial (trial index: 1808091348; performing individual index: 180809-4).
